# Supplementary material for: Development and Validation of a Diagnostic Model for Biliary Tract Cancer Detection in Patients with Benign Biliary Disease: A Multicenter, Retrospective Case-Control Study
Source: Research Square preprint supplement (doi:10.21203/rs.3.rs-8736730/v1), 2026-02-11
Supplement: Supplementary file 1 [file 2fcc30085933765785b331c1.docx]

**Supplementary Tables**

Supplementary Table 1. The specific subtypes of benign biliary tract diseases included in the study.

| UR | benign neoplasm of esophagus | cholesterol polyps | GB ademyomatosis | pancreatic tail cancer |
| --- | --- | --- | --- | --- |
| acalcuous cholecystitis | Benign neoplasm of rectosigmoid junction | chronic cholangitis | GB ADM | pancreatitis |
| acute biliary pancreatitis | biliary acute pancreatitis | chronic cholecystitis | GB ADM, cholelithiasis | pancreatitis,hepatico-cholangitis |
| acute cholecystitis | Biliary cirrhosis | chronic gastritis | GB ADM, GB Autolysis | pancreatitis/pneumonia |
| acute interstitial pancreatitis | Biliary hamartoma | chronic pancreatitis | GB colic | PCN |
| acute pancreatitis | biliary pancreatitis | Clorchiasis | GB empyema, chronic cholecystitis | perforated cholecystitis |
| adema | biliary sepsis | colon adema | GB hydrops | Periampullary diverticulum |
| adema ascending colon | Biliary sludges | colon polyp | GB ICPN | polyp of colon |
| adema colon | BilIN, low grade | cystic duct stone | GB polyp | porcelain GB |
| adema rectum | calculous cholecystitis/acute pancreatitis | dilatation of bile duct | GB polyp,cholesterolosis | primary biliary cirrhosis |
| adema transverse colon | calculus of bile duct with cholangitis | Distal CBD stricture | GB segmental ADM | primary sclerosing cholangitis |
| Ademyomatosis | carciid tumor,rectum(uncertain malignant potential) | duodenal adema | GB sludge | R/O benign CBD stricture |
| Ademyomatosis of GB | CBD obstruction | duodenal bulb obstruction | IgG4-related disease | R/O Biliary sludges |
| Ademyomatosis, cholelithiasis | CBD sludge | esophageal stricture | IHD dilatation | r/o Mirizzi syndrome |
| ADM | CBD stricture | fundal ademyomatosis of GB | IHD stone | RCC |
| ADM of GB | cholangitis | gastric adema | intraductal papillary-tubular neoplasm, high grade dysplasia of GB | rectal adema |
| ADM with chronic cholecystitis | cholecystitis | gastric adema/cancer | liver abscess | rectal polyp |
| alcoholic hepatitis | cholecystitis, pancreatic cancer | gastric adenama | necrotizing pancreatitis | rmal |
| ampullary adema | Choledochal cyst | gastric cancer | other cholelithiasis | sclerosing cholangitis |
| AoV adema | choledocholithiasis | gastric outlet obstruction | other cholelithiasis with obstruction | sclerosing cholangitis,CBD obstruction |
| atypical epigastric pain | choledocholithiasis with cholangitis | gastric polyp | pancreatic cancer | secondary sclerosing cholangitis |
| benign biliary stricture | choledocholithiasis with cholecystitis | gastric/duodenal ulcer | pancreatic cystic neoplasm | septic shock d/t cholangitis |
| Benign CBD stricture | cholelithiasis | GB ademyoma | pancreatic pseudocyst | sigmoid colon adema |
| Sludges | tubular adema,colon | CBD stone | IHD stone | GB stone |
| Acute cholecystitis | Chronic cholecystitis | Cholangitis | IPN-B |  |

Supplementary Table 2. The 57 biomarkers of the medical records and their corresponding p-values. The final 26 biomarkers involved in the model are the bolded ones.

| Biomarker | p-value | Biomarker | p-value |
| --- | --- | --- | --- |
| **ALP** | **<0.001** | Hormone_replacement | 0.0285 |
| **ESR** | **<0.001** | Thyroid disease | 0.0349 |
| **GGT** | **<0.001** | phosphorus | 0.0569 |
| **Age** | **<0.001** | experience_freshwater_fish | 0.0599 |
| **Total Bilirubin** | **<0.001** | Herbal medication | 0.0667 |
| **CEA** | **<0.001** | Prothrombin_Time | 0.068 |
| **Albumin** | **<0.001** | Viral_hepatitis | 0.0978 |
| **HCVAb_negative** | **<0.001** | Clonorchiasis | 0.1114 |
| **Direct Bilirubin** | **<0.001** | Pulmonary_disease | 0.1129 |
| **Platelets** | **<0.001** | Blood_Urea_Nitrogen | 0.1458 |
| **HBsAg_negative** | **<0.001** | White_Blood_Cells | 0.1519 |
| **weight** | **<0.001** | sex_male | 0.1797 |
| **Hematocrit** | **<0.001** | sex_female | 0.1797 |
| **Hemoglobin** | **<0.001** | Glucose | 0.1802 |
| **GOT** | **<0.001** | Cholesterol lowering agent | 0.2227 |
| **Activated_Partial_Thromboplastin_Time** | **<0.001** | waist | 0.2384 |
| **C Reactive Protein** | **<0.001** | Aspirin | 0.2634 |
| **Uric_Acid** | **<0.001** | HCVAb_positive | 0.2693 |
| **height** | **<0.001** | Calcium | 0.4254 |
| **GPT** | **<0.001** | Cancer_of_1st_degree_relatives | 0.4303 |
| **HBsAb_negative** | **<0.001** | Calcium supplement | 0.4491 |
| **HBsAb_positive** | **<0.001** | Cerebrovascular_disease | 0.5015 |
| **Fatty_Liver** | **<0.001** | Absolute_Neutrophils | 0.527 |
| **Alcohol_status** | **0.0019** | Liver_Cirrhosis | 0.5718 |
| **Vitamin** | **0.004** | HBsAg_positive | 0.605 |
| **Regular_daily_activity(1hr/day)** | **0.013** | HbA1c | 0.6361 |
| Total Protein | 0.0163 | Creatinine | 0.7619 |
| Diabetes | 0.0214 |  |  |

Supplementary Table 3. Additional baseline characteristics not included in the final analytic panel—demographic characteristics, lifestyle factors, and family history

| **Clinical variables** | **Training Cohort** | | | **External Validation Cohort** | | |
| --- | --- | --- | --- | --- | --- | --- |
|  | **BTD (n=891)** | **BTC (n=548)** | **p-value** | **BTD (n=164)** | **BTC (n=81)** | **p-value** |
| Cadiovascular_disease | 430 (48.3%) | 313 (57.1%) | 0.001 | 59 (36.0%) | 44 (54.3%) | 0.006 |
| Pulmonary_disease | 62 (7.0%) | 35 (6.4%) | 0.675 | 10 (6.1%) | 11 (13.6%) | 0.049 |
| Cerebrovascular_disease | 81 (9.1%) | 73 (13.3%) | 0.012 | 13 (7.9%) | 5 (6.2%) | 0.621 |
| Fatty_Liver | 21 (2.4%) | 2 (0.4%) | 0.002 | 8 (4.9%) | 1 (1.2%) | 0.278 |
| Liver_Cirrhosis | 9 (1.0%) | 5 (0.9%) | 0.855 | 0 (0.0%) | 2 (2.5%) | 0.108 |
| Viral_hepatitis | 27 (3.0%) | 11 (2.0%) | 0.240 | 8 (4.9%) | 5 (6.2%) | 0.671 |
| inflammatory_bowel_disease | 1 (0.1%) | 0 (0.0%) | 1.000 | 1 (0.6%) | 2 (2.5%) | 0.255 |
| Diabetes | 212 (23.8%) | 153 (27.9%) | 0.081 | 33 (20.1%) | 18 (22.2%) | 0.703 |
| Thyroid disease | 44 (4.9%) | 17 (3.1%) | 0.093 | 11 (6.7%) | 4 (4.9%) | 0.779 |
| Hormone_replacement | 24 (2.7%) | 8 (1.5%) | 0.123 | 1 (0.6%) | 1 (1.2%) | 0.553 |
| Calcium supplement | 29 (3.3%) | 14 (2.6%) | 0.449 | 5 (3.0%) | 5 (6.2%) | 0.245 |
| Aspirin | 68 (7.6%) | 50 (9.1%) | 0.316 | 11 (6.7%) | 10 (12.3%) | 0.138 |
| Cholesterol lowering agent | 179 (20.1%) | 95 (17.3%) | 0.196 | 14 (8.5%) | 6 (7.4%) | 0.761 |
| Vitamin | 177 (19.9%) | 77 (14.1%) | 0.005 | 26 (15.9%) | 9 (11.1%) | 0.318 |
| Herbal medication | 91 (10.2%) | 43 (7.8%) | 0.134 | 15 (9.1%) | 13 (16.0%) | 0.110 |
| Smoker/ Never Smoker, n (%) |  |  | 0.061 |  |  | 0.014 |
| Never Smoker | 481 (54.0%) | 268 (48.9%) |  | 102 (62.2%) | 37 (45.7%) |  |
| Smoker | 410 (46.0%) | 280 (51.1%) |  | 62 (37.8%) | 44 (54.3%) |  |
| Current smoker, n (%) | 125 (30.6%) | 65 (23.2%) | 0.034 | 23 (38.3%) | 5 (11.4%) | 0.002 |
| Alcohol consumption status, n (%) |  |  | <0.001 |  |  | <0.001 |
| 1. Yes, currently drinking | 335 (37.7%) | 134 (24.5%) |  | 62 (37.8%) | 15 (18.5%) |  |
| 2. No, used to drink (quit). | 165 (18.6%) | 165 (30.1%) |  | 35 (21.3%) | 35 (43.2%) |  |
| 3. No, never drinks. | 388 (43.7%) | 249 (45.4%) |  | 67 (40.9%) | 31 (38.3%) |  |
| Intake of raw freshwater fish, n (%) | 223 (25.1%) | 161 (29.4%) | 0.076 | 55 (33.5%) | 39 (48.1%) | 0.027 |
| Frequency of intake, n (%) |  |  | 0.409 |  |  | 0.618 |
| 1 time | 28 (12.6%) | 14 (8.8%) |  | 9 (16.7%) | 5 (13.5%) |  |
| 2-4 times | 80 (36.0%) | 65 (40.6%) |  | 20 (37.0%) | 11 (29.7%) |  |
| 5 times over | 114 (51.4%) | 81 (50.6%) |  | 25 (46.3%) | 21 (56.8%) |  |
| Clonorchiasis | 30 (3.4%) | 30 (5.5%) | 0.054 | 12 (7.4%) | 3 (3.8%) | 0.397 |
| Regular_daily_activity(1hr/day) | 0.29 (0.00–0.86) | 0.00 (0.00–0.86) | 0.078 | 0.09 (0.00–0.86) | 0.14 (0.00–1.00) | 0.217 |
| Regular_daily_exercise(1hr/day) | 0.00 (0.00–0.14) | 0.00 (0.00–0.00) | <0.001 | 0.00 (0.00–0.43) | 0.00 (0.00–1.00) | 0.532 |
| Cancer_Hx__of_1st_degree_relatives | 320 (37.6%) | 178 (37.7%) | 0.981 | 55 (34.2%) | 34 (44.2%) | 0.136 |
| Cancer_Hx_of_2nd_degree_relatives | 56 (7.8%) | 23 (6.3%) | 0.367 | 22 (16.8%) | 8 (14.3%) | 0.669 |

Supplementary Table 4. Baseline characteristics of patients with benign biliary tract disease and those with biliary tract cancer stratified by anatomic subtype.

|  |  | Biliary Tract Cancer Subtypes | | | |
| --- | --- | --- | --- | --- | --- |
| Clinical  Variables | Benign biliary tract disease | Intrahepatic Cholangiocarcinoma | Perihilar Cholangiocarcinoma | Distal Cholangiocarcinoma | Gallbladder  Cancer |
| Age, y | 65.00 (55.00–75.00) | 73.00 (67.00–78.00) | 70.00 (64.00–76.00) | 74.00 (67.00–79.00) | 74.00 (69.00–79.00) |
| Height, cm | 163.00 (156.20–169.90) | 158.10 (152.00–164.10) | 162.00 (156.00–166.60) | 162.00 (153.93–167.00) | 162.70 (155.30–166.93) |
| Weight, kg | 63.00 (55.78–71.50) | 59.00 (52.00–65.00) | 59.00 (53.00–64.80) | 59.05 (54.00–66.88) | 60.00 (53.92–66.25) |
| Waist, cm | 32.00 (30.00–34.00) | 31.50 (29.00–32.00) | 32.00 (30.00–34.00) | 32.00 (30.00–33.00) | 32.00 (30.00–34.00) |
| Male | 575 (54.5%) | 73 (45.3%) | 74 (63.2%) | 89 (59.3%) | 90 (66.2%) |
| Diabetes | 249 (23.6%) | 40 (24.8%) | 38 (32.5%) | 39 (26.0%) | 46 (33.8%) |
| Alcohol Usage, n (%) |  |  |  |  |  |
| Current | 380 (36.0%) | 29 (18.0%) | 30 (25.6%) | 37 (24.7%) | 29 (21.3%) |
| Former | 233 (22.1%) | 48 (29.8%) | 43 (36.8%) | 46 (30.7%) | 49 (36.0%) |
| Never | 442 (41.9%) | 84 (52.2%) | 44 (37.6%) | 67 (44.7%) | 58 (42.6%) |
| Lab Results |  |  |  |  |  |
| ANC, x10⁹/L | 4.60 (3.25–7.00) | 4.70 (3.53–7.64) | 4.99 (3.25–6.92) | 4.60 (3.48–6.35) | 4.46 (3.26–5.80) |
| Hemoglobin, g/dL | 13.10 (12.10–14.35) | 12.40 (11.30–13.60) | 12.60 (11.10–13.80) | 12.60 (11.22–13.70) | 12.50 (11.30–13.53) |
| Hematocrit, % | 38.70 (35.85–42.20) | 36.80 (33.80–40.60) | 36.90 (33.30–41.00) | 37.50 (33.10–40.58) | 36.95 (33.38–40.10) |
| Platelets, x10⁹/L | 222.00 (177.00–269.00) | 253.00 (208.00–330.00) | 234.00 (184.00–290.00) | 254.50 (194.00–298.75) | 243.50 (197.75–306.75) |
| ESR, mm/hour | 33.00 (26.00–33.00) | 33.00 (33.00–42.00) | 33.00 (33.00–56.00) | 37.00 (33.00–70.00) | 33.00 (33.00–54.50) |
| CRP, mg/dL | 0.63 (0.11–2.26) | 0.63 (0.19–3.88) | 1.05 (0.27–3.20) | 0.95 (0.33–3.04) | 0.84 (0.26–2.24) |
| Total Protein, g/dL | 7.02 (6.60–7.40) | 7.00 (6.50–7.40) | 6.90 (6.58–7.30) | 6.86 (6.50–7.20) | 6.85 (6.40–7.20) |
| Albumin, g/dL | 4.22 (3.93–4.50) | 4.07 (3.66–4.40) | 4.10 (3.70–4.40) | 3.91 (3.50–4.25) | 4.08 (3.73–4.20) |
| Total Bilirubin, g/dL | 0.83 (0.49–1.93) | 0.69 (0.50–1.80) | 0.76 (0.43–1.52) | 6.64 (1.26–12.32) | 4.89 (0.96–12.11) |
| Direct Bilirubin, mg/dL | 0.74 (0.30–0.93) | 0.74 (0.23–0.92) | 0.41 (0.23–0.74) | 4.61 (0.74–9.20) | 4.41 (0.74–10.00) |
| AST, U/L | 31.00 (21.00–117.00) | 33.00 (23.00–102.00) | 43.00 (24.00–83.00) | 91.50 (45.00–162.25) | 88.50 (33.75–165.00) |
| ALT, U/L | 30.00 (17.00–124.00) | 31.00 (17.00–101.00) | 23.00 (16.00–51.00) | 90.50 (33.25–190.50) | 82.00 (29.75–223.75) |
| ALP, U/L | 94.00 (67.00–166.50) | 113.00 (76.00–382.00) | 168.00 (96.00–384.00) | 377.50 (207.00–545.50) | 371.00 (185.00–595.50) |
| GGT, U/L | 173.50 (32.00–283.50) | 165.00 (36.00–388.00) | 173.50 (82.00–446.00) | 554.00 (177.75–940.75) | 479.00 (173.50–1134.00) |
| Phosphorus, mg/dL | 3.24 (2.81–3.60) | 3.37 (3.08–3.77) | 3.24 (2.92–3.60) | 3.21 (2.70–3.56) | 3.24 (2.87–3.60) |
| Uric Acid, mg/dL | 4.46 (3.93–5.59) | 4.40 (3.50–5.40) | 4.46 (3.50–5.60) | 4.40 (3.30–4.92) | 4.05 (2.96–4.66) |
| BUN, mg/dL | 14.40 (11.50–18.70) | 14.60 (11.60–20.00) | 14.90 (12.00–18.40) | 15.40 (11.93–19.25) | 14.95 (11.90–18.35) |
| Creatinine, mg/dL | 0.80 (0.66–0.97) | 0.80 (0.66–0.99) | 0.78 (0.67–0.94) | 0.81 (0.72–1.01) | 0.81 (0.67–0.97) |
| CA19-9, U/mL | 13.04 (6.39–27.65) | 48.61 (12.20–736.10) | 228.42 (26.94–1922.00) | 147.00 (30.88–740.12) | 84.47 (19.73–285.50) |
| CEA, ng/mL | 2.30 (1.90–2.30) | 2.60 (2.00–5.10) | 3.62 (2.30–10.58) | 2.30 (1.99–3.59) | 2.34 (1.80–3.60) |
| PT, s | 12.00 (11.40–12.70) | 12.00 (11.40–12.60) | 12.20 (11.70–12.90) | 11.85 (11.20–12.70) | 11.90 (11.30–12.70) |
| APTT, s | 27.50 (25.60–29.50) | 27.50 (25.90–30.30) | 27.60 (26.00–31.70) | 27.75 (26.12–30.90) | 27.80 (26.40–32.08) |
| Glucose, mg/dL | 121.00 (106.00–142.00) | 121.00 (108.00–142.00) | 121.00 (103.00–147.00) | 121.50 (107.00–142.50) | 121.00 (105.00–154.00) |
| HbA1c, % | 5.80 (5.80–5.80) | 5.80 (5.80–5.90) | 5.80 (5.70–6.10) | 5.80 (5.63–6.00) | 5.80 (5.61–6.10) |
| HBsAg, n (%) |  |  |  |  |  |
| Positive | 25 (3.1%) | 2 (1.4%) | 10 (9.8%) | 2 (1.5%) | 4 (3.4%) |
| Negative | 729 (91.5%) | 135 (94.4%) | 92 (90.2%) | 128 (96.2%) | 114 (95.8%) |
| HBsAb, n (%) |  |  |  |  |  |
| Positive | 434 (59.5%) | 85 (63.9%) | 51 (53.1%) | 75 (57.7%) | 61 (56.0%) |
| Negative | 255 (34.9%) | 42 (31.6%) | 45 (46.9%) | 52 (40.0%) | 46 (42.2%) |
| HCVAb, n (%) |  |  |  |  |  |
| Positive | 15 (2.0%) | 3 (2.2%) | 2 (2.0%) | 3 (2.3%) | 2 (1.8%) |
| Negative | 705 (93.4%) | 133 (95.7%) | 99 (98.0%) | 125 (95.4%) | 108 (96.4%) |

Data are presented as median with interquartile range (IQR), defined by the first (Q1) and third (Q3) quartiles. Categorical variables are expressed as counts and percentages, n (%).

ANC, absolute neutrophil count; ESR, erythrocyte sedimentation rate; CRP, c-reactive protein; AST, alanine aminotransferase; ALT, alanine aminotransferase; ALP, alkaline phosphatase; GGT, gamma-glutamyl transferase; BUN, blood urea nitrogen; CA19-9, carbohydrate antigen 19-9; CEA, carcinoembryonic antigen; PT, prothrombin time; APTT, activated partial thromboplastin time; HbA1c, hemoglobin a1c; HBsAg, hepatitis b surface antigen; HBsAb, hepatitis b surface antibody; HCVAb, hepatitis c virus antibody.

Supplementary Table 5. Comparison of diagnostic performances between Logistic regression, XGBoost and TabPFN.

| Model | AUROC  (95% CI) | Sensitivity  (95% CI) | Specificity  (95% CI) | PPV  (95% CI) | NPV  (95% CI) |
| --- | --- | --- | --- | --- | --- |
| Internal Validation |  |  |  |  |  |
| Log. regression | 0.834 (0.79–0.88) | 0.593 (0.51–0.66) | 0.903 (0.87–0.94) | 0.793 (0.73–0.86) | 0.782 (0.75–0.82) |
| Log. regression (OC) | 0.834 (0.79–0.88) | 0.719 (0.55–0.85) | 0.830 (0.68–0.94) | 0.737 (0.62–0.86) | 0.830 (0.77–0.89) |
| XGBoost | 0.879 (0.84–0.91) | 0.693 (0.59–0.76) | 0.880 (0.83–0.91) | 0.782 (0.70–0.84) | 0.823 (0.78–0.86) |
| XGBoost (OC) | 0.879 (0.84–0.91) | 0.800 (0.72–0.91) | 0.821 (0.71–0.89) | 0.739 (0.64–0.82) | 0.870 (0.84–0.93) |
| TabPFN | 0.893 (0.86–0.92) | 0.682 (0.59–0.75) | 0.910 (0.87–0.94) | 0.825 (0.77–0.89) | 0.823 (0.78–0.86) |
| TabPFN (OC) | 0.893 (0.86–0.92) | 0.784 (0.73–0.83) | 0.839 (0.79–0.89) | 0.752 (0.69–0.82) | 0.863 (0.83–0.89) |
| External Validation |  |  |  |  |  |
| Log. regression | 0.795 (0.74–0.85) | 0.730 (0.63–0.83) | 0.732 (0.66–0.80) | 0.574 (0.48–0.67) | 0.846 (0.79–0.90) |
| Log. regression (OC) | 0.795 (0.74–0.85) | 0.689 (0.50–0.87) | 0.798 (0.57–0.95) | 0.649 (0.49–0.85) | 0.842 (0.77–0.91) |
| XGBoost | 0.840 (0.79–0.89) | 0.789 (0.70–0.88) | 0.746 (0.68–0.81) | 0.604 (0.51–0.70) | 0.878 (0.82–0.93) |
| XGBoost (OC) | 0.840 (0.79–0.89) | 0.761 (0.60–0.87) | 0.801 (0.70–0.93) | 0.661 (0.54–0.83) | 0.873 (0.81–0.93) |
| TabPFN | 0.855 (0.81–0.90) | 0.744 (0.65–0.83) | 0.767 (0.70–0.83) | 0.612 (0.51–0.70) | 0.858 (0.80–0.92) |
| TabPFN (OC) | 0.855 (0.81–0.90) | 0.829 (0.74–0.90) | 0.616 (0.54–0.68) | 0.516 (0.43–0.60) | 0.879 (0.82–0.94) |
