# Supplementary material for: Development and Validation of a Diagnostic Model for Biliary Tract Cancer Detection in Patients with Benign Biliary Disease: A Multicenter, Retrospective Case-Control Study
Source: Research Square preprint supplement (doi:10.21203/rs.3.rs-8736730/v1), 2026-02-11
Supplement: Supplementary file 2 [file d3d7fd7528b89796f54237ad.docx]

**Dataset feature selection - Supplementary**

The initial stage of feature selection involved the exclusion of variables deemed clinically irrelevant to the construction of a BTC risk prediction model. The irrelevant features grouped based on four criteria are shown below:

• Features for criterion 1: Categorical features with excessive cardinalities / Feature values in plain text format / Features only included in a specific sociodemographic group (e.g., menopause, nulligravida)

• Features for criterion 2: MRCP, ERCP, PTBD, PTGBD, PET-CT, MRI, CT, Ultrasonography related features

• Features for criterion 3: Therapeutic features associated with chemotherapy and radiotherapy / Surgical Histories of CCA

• Features for criterion 4: Family medical history above the 2nd degree

Criterion 1 was designed to exclude features not suitable for model training in the context of our classification objective. We retained only numerical and low-cardinality categorical features, excluding free-text clinical notes and group-specific variables (e.g., menopause, nulligravida) to avoid demographic bias. As our focus was on non-radiologic biomarkers for cholangiocarcinoma (CCA) diagnosis, all image-derived variables were removed (criterion 2). Prognostic features unrelated to diagnosis were excluded (criterion 3), along with clinically irrelevant variables as determined by expert consultation (criterion 4). This feature curation improved both computational efficiency and model performance.
